# Supplementary material for: Sensitive ctDNA detection by a novel zinc(ii) complex with two-photon absorption based on electrochemiluminescence
Source: Royal Society of Chemistry journal article supplement (doi:10.1039/c4nj01727g), 2014-12-15
Supplement: c4nj01727g1.pdf [file c4nj01727g1.pdf]

## Sensitive ctDNA detection of a novel zinc (II) complex with two-photon absorption based on electrochemiluminescence

Junsong Yang,<sup>ab</sup> Bing Liu,<sup>a</sup> Jieying Wu,<sup>a</sup> Shengyi Zhang,<sup>\*a</sup> Baokang Jin<sup>a</sup> and Yupeng Tian<sup>a</sup>

<sup>a</sup>Department of Chemistry, Anhui University, Hefei 230039, China

<sup>b</sup>Teaching and Research Office of Chemistry, Department of Public Course, Bengbu Medical College, Bengbu 233000, China

\*Corresponding author. Tel./fax: +86 551 63861279.

E-mail address: syzhangj@126.com.

Published in New Journal of Chemistry.

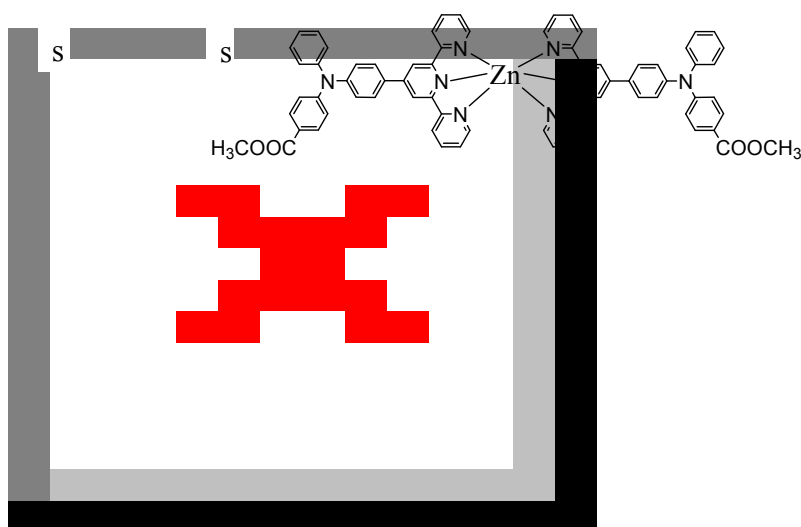

**Fig. 1** Experimental analysis spectra: The <sup>1</sup>H spectra of zinc (II) complex.

7 #14-20 RT: 0.06-0.08 AV: 7 NL: 3.01E3  
T: ITMS + p ESI Full ms [50.00-1000.00]

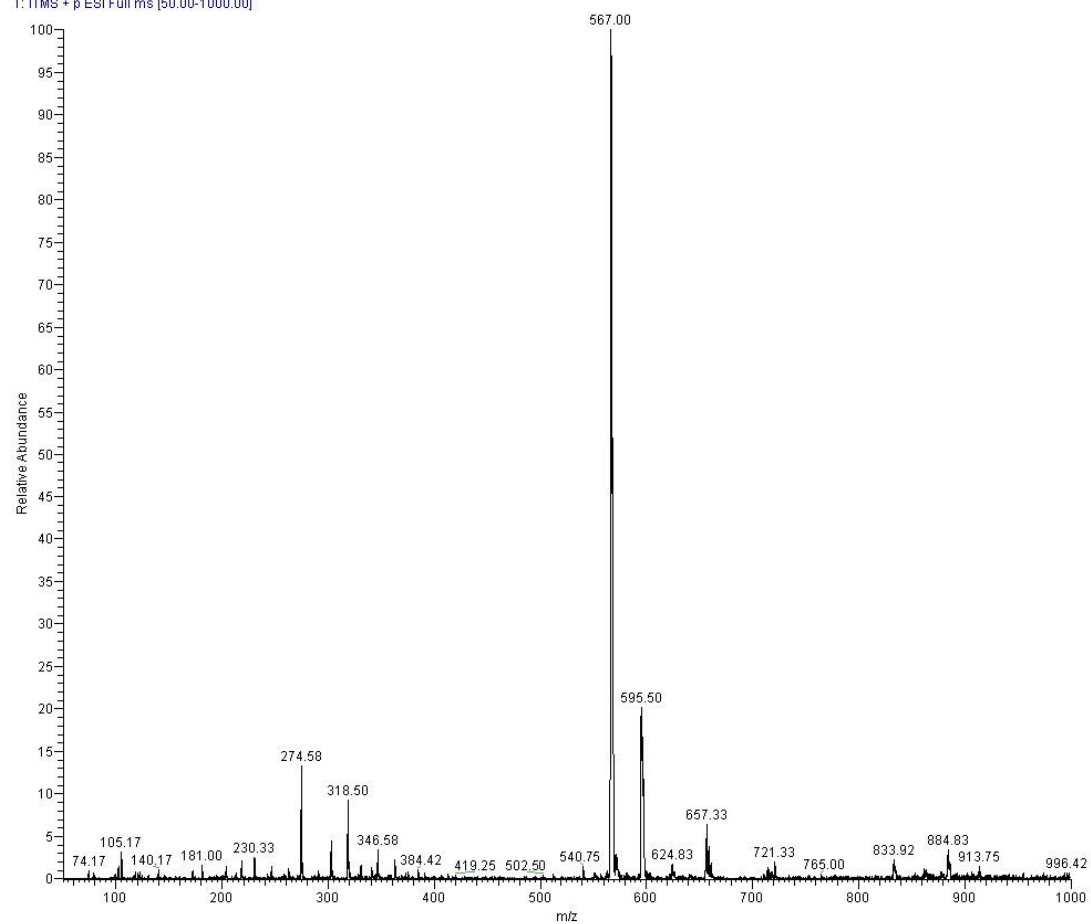

**Fig. 2** Experimental analysis spectra: The ESI-MS of zinc (II) complex.
